# Supplementary material
Source: Research Square preprint supplement (doi:10.21203/rs.3.rs-10164567/v1)
Supplement: Supplementary file 1 [file d182936ec578b0a9c9695918.docx]

**Appendix A. Illustrative sample of coded verses**

To enhance transparency, Table A1 provides an illustrative sample of verses coded under the primary constructs used in the quantitative mapping (al-Mīzān, fasād, iṣlāḥ, istikhlāf) along with their Meccan/Medinan designation as used in this study. The full list of 315 verses and complete coding tables are available upon reasonable request.

| Verse | Primary code(s) | Phase | Note (function/topic) |
| --- | --- | --- | --- |
| Q 55:7–9 | al-Mīzān | Meccan* | Balance/justice in measurement; limits against transgression |
| Q 30:41 | fasād | Meccan | Corruption on land/sea; accountability framing |
| Q 7:56 | fasād, iṣlāḥ | Meccan | Prohibition of corruption after reform |
| Q 2:30 | istikhlāf | Medinan | Human vicegerency; stewardship premise |
| Q 33:72 | amānah, istikhlāf | Medinan | Trust and responsibility; moral burden |
| Q 7:31 | al-Mīzān (moderation) | Meccan | Prohibition of waste; consumption discipline |
| Q 59:7 | justice (distribution) | Medinan | Equitable distribution; social foundation |
| Q 18:7 | trial/accountability | Meccan | Earth as test; incentive for good deeds |
| Q 102:8 | accountability | Meccan | Accountability for blessings; ethical restraint |

* The Meccan/Medinan designation for Q 55 (Sūrat al-Raḥmān) is treated as Meccan in this study following common classifications; alternative classifications exist in the literature. Sensitivity checks can be applied if an alternative classification is preferred.
